# Supplementary material for: Syntheses, structures and photophysical properties of tetranuclear Cd–Ln coordination complexes
Source: Royal Society of Chemistry journal article supplement (doi:10.1039/b905113a), 2009-01-01
Supplement: b905113a.pdf [file b905113a.pdf]

## Supplementary information to be published electronically

### 1. The UV-Vis-NIR spectra of complex 3 and ligands

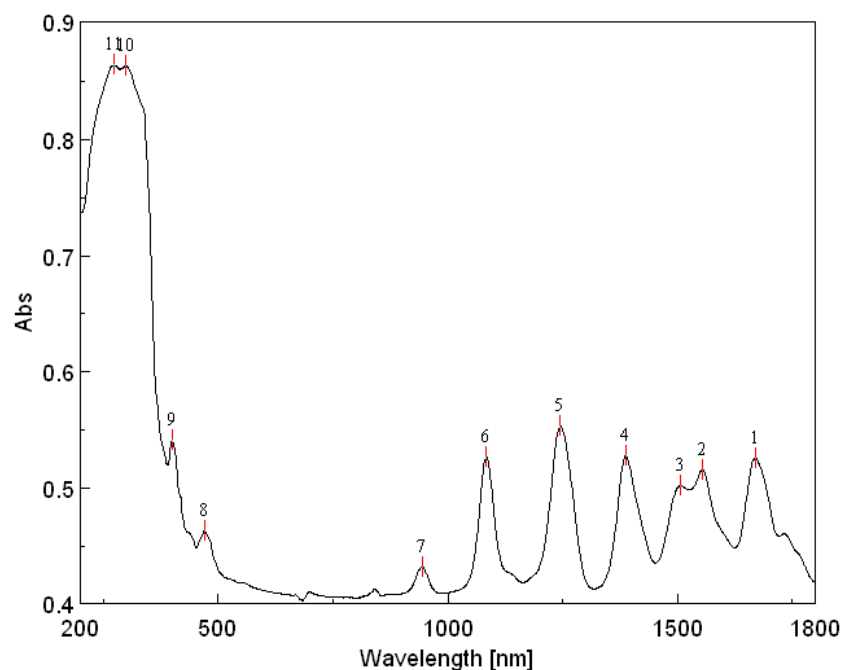

**Fig. S1** The UV-Vis-NIR spectrum of complex 3

The absorption spectrum of the complex 3 gives 9 absorption bands (peak 1-9) corresponding to  ${}^6\text{H}_{5/2} \rightarrow {}^6\text{F}_{1/2}$ ,  ${}^6\text{H}_{5/2} \rightarrow {}^6\text{H}_{15/2}$ ,  ${}^6\text{H}_{5/2} \rightarrow {}^6\text{F}_{3/2}$ ,  ${}^6\text{H}_{5/2} \rightarrow {}^6\text{F}_{5/2}$ ,  ${}^6\text{H}_{5/2} \rightarrow {}^6\text{F}_{7/2}$ ,  ${}^6\text{H}_{5/2} \rightarrow {}^6\text{F}_{9/2}$ ,  ${}^6\text{H}_{5/2} \rightarrow {}^6\text{F}_{11/2}$ ,  ${}^6\text{H}_{5/2} \rightarrow {}^4\text{F}_{5/2}$  and  ${}^6\text{H}_{5/2} \rightarrow {}^4\text{F}_{7/2}$  transitions of the Sm(III) ion, respectively.

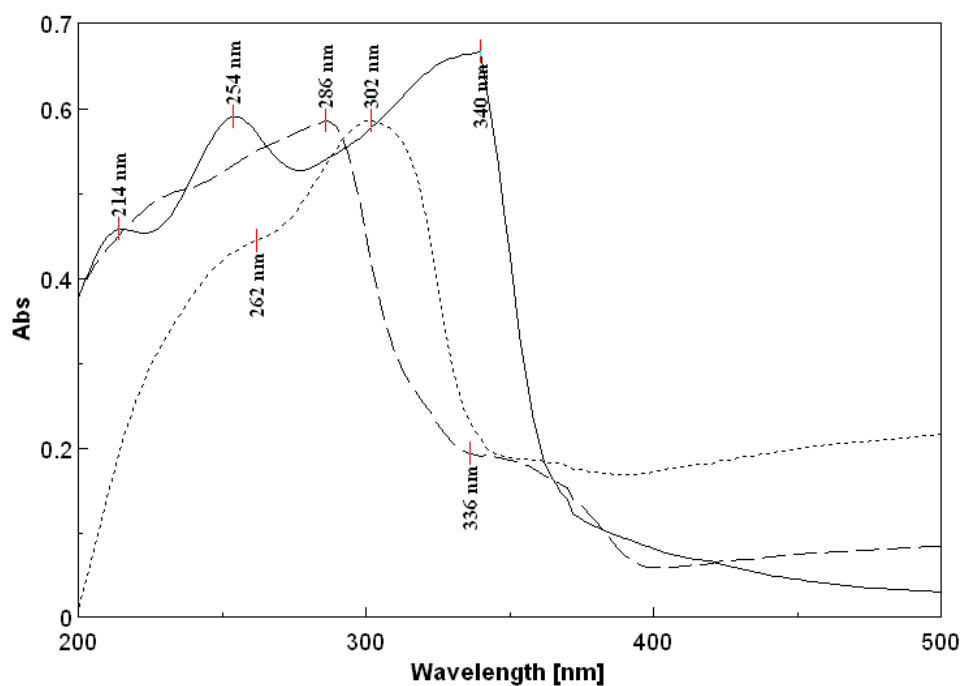

**Fig. S2** The UV-Vis-NIR spectra of *p*-toluic acid (...), *p*-chloro-benzoic acid (- - -) and phenol (—)

## 2. The emission spectra of ligands, complexes 1 and 4 in the UV-Vis region

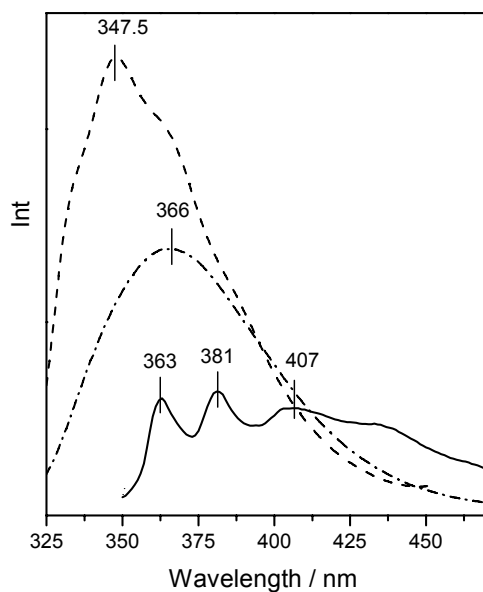

**Fig. S3** The emission spectra of *p*-toluic acid (- · - · -) ( $\lambda_{\text{Ex}} = 314$  nm), *p*-chloro-benzoic acid (- - -) ( $\lambda_{\text{Ex}} = 316$  nm) and phen (—) ( $\lambda_{\text{Ex}} = 344$  nm)

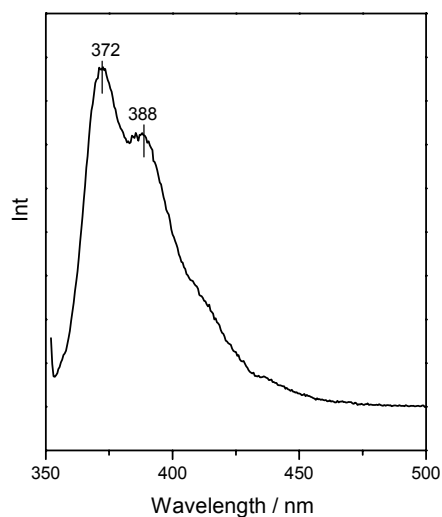

**Fig. S4** The emission spectra of complex 1

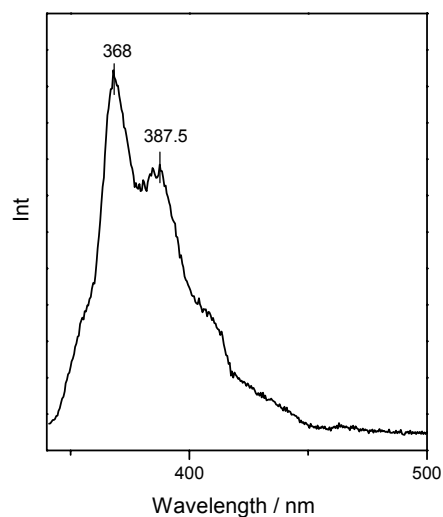

**Fig. S5** The emission spectra of complex 4

### 3. The packing diagram of complexes 1 and 4

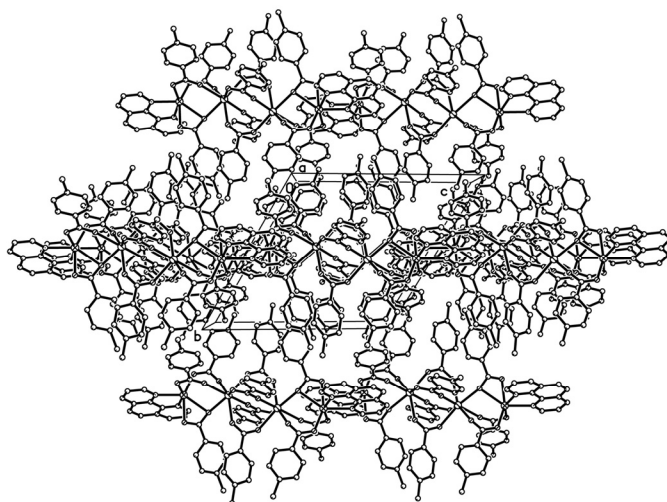

**Fig. S6** The packing diagram of complex 1.

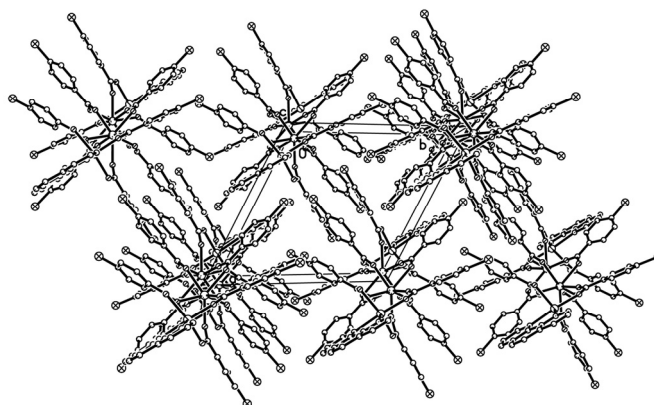

**Fig. S7** The packing diagram of complex 4.

### 4. The IR spectra of complexes

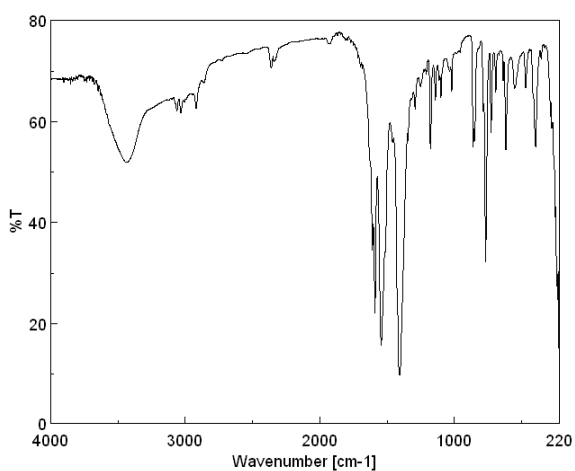

**Fig. S8** The IR spectrum of complex 1

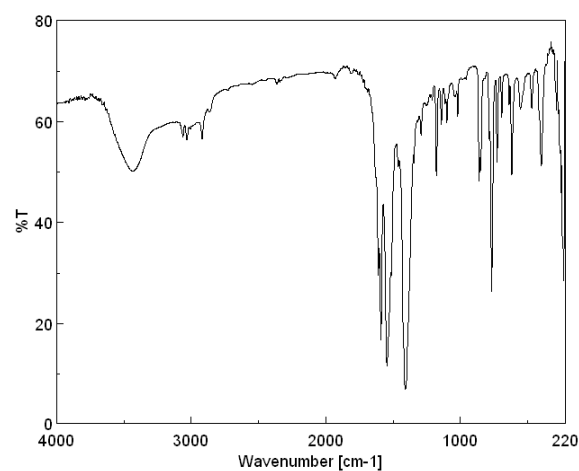

**Fig. S9** The IR spectrum of complex 2

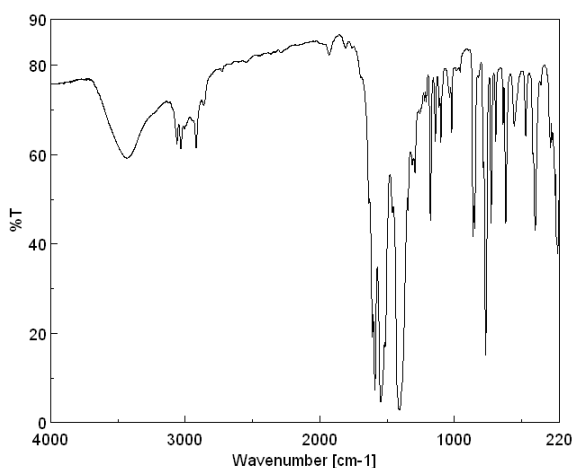

**Fig. S10** The IR spectrum of complex **3**

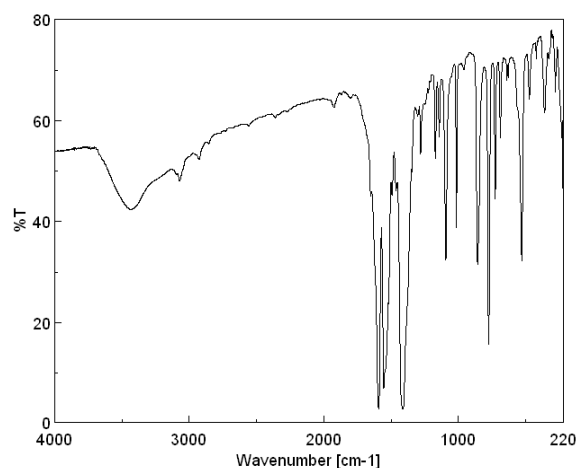

**Fig. S11** The IR spectrum of complex **4**

#### 4. Selected bond angles of complexes 1-4

**Table S1** Selected bond angles [°] for complex **1**

|                  |            |                  |            |                  |            |
|------------------|------------|------------------|------------|------------------|------------|
| O(3)-Nd(1)-O(8)  | 160.12(11) | O(3)-Nd(1)-O(2)  | 77.45(12)  | O(8)-Nd(1)-O(2)  | 103.80(12) |
| O(3)-Nd(1)-O(5)  | 83.78(12)  | O(8)-Nd(1)-O(5)  | 77.02(12)  | O(2)-Nd(1)-O(5)  | 79.72(12)  |
| O(3)-Nd(1)-O(1)  | 81.10(11)  | O(8)-Nd(1)-O(1)  | 111.75(11) | O(2)-Nd(1)-O(1)  | 127.74(10) |
| O(5)-Nd(1)-O(1)  | 143.94(12) | O(3)-Nd(1)-O(4)  | 126.21(11) | O(8)-Nd(1)-O(4)  | 72.83(11)  |
| O(2)-Nd(1)-O(4)  | 78.69(12)  | O(5)-Nd(1)-O(4)  | 137.12(12) | O(1)-Nd(1)-O(4)  | 76.80(12)  |
| O(3)-Nd(1)-O(9)  | 87.10(11)  | O(8)-Nd(1)-O(9)  | 81.92(11)  | O(2)-Nd(1)-O(9)  | 148.41(12) |
| O(5)-Nd(1)-O(9)  | 71.26(12)  | O(1)-Nd(1)-O(9)  | 75.43(10)  | O(4)-Nd(1)-O(9)  | 131.72(11) |
| O(7)-Cd(2)-O(6)  | 97.97(14)  | O(7)-Cd(2)-N(1)  | 85.05(12)  | O(6)-Cd(2)-N(1)  | 106.77(13) |
| O(7)-Cd(2)-O(10) | 99.51(13)  | O(6)-Cd(2)-O(10) | 153.10(13) | N(1)-Cd(2)-O(10) | 94.99(12)  |
| O(7)-Cd(2)-N(2)  | 154.88(13) | O(6)-Cd(2)-N(2)  | 87.14(13)  | N(1)-Cd(2)-N(2)  | 69.97(14)  |
| O(10)-Cd(2)-N(2) | 85.65(13)  | O(7)-Cd(2)-O(9)  | 111.29(11) | O(6)-Cd(2)-O(9)  | 101.31(12) |
| N(1)-Cd(2)-O(9)  | 145.14(12) | O(10)-Cd(2)-O(9) | 53.11(11)  | N(2)-Cd(2)-O(9)  | 91.56(12)  |

**Table S2** Selected bond lengths [Å] and angles [°] for complex **2**

|                  |            |                  |            |                 |            |
|------------------|------------|------------------|------------|-----------------|------------|
| O(10)-Pr(1)-O(1) | 160.44(11) | O(10)-Pr(1)-O(7) | 77.13(10)  | O(1)-Pr(1)-O(7) | 104.47(11) |
| O(10)-Pr(1)-O(4) | 84.07(11)  | O(1)-Pr(1)-O(4)  | 77.12(11)  | O(7)-Pr(1)-O(4) | 80.05(11)  |
| O(10)-Pr(1)-O(8) | 81.34(11)  | O(1)-Pr(1)-O(8)  | 111.02(11) | O(7)-Pr(1)-O(8) | 127.73(10) |
| O(4)-Pr(1)-O(8)  | 143.86(10) | O(10)-Pr(1)-O(9) | 126.18(10) | O(1)-Pr(1)-O(9) | 72.64(10)  |
| O(7)-Pr(1)-O(9)  | 78.87(11)  | O(4)-Pr(1)-O(9)  | 137.09(11) | O(8)-Pr(1)-O(9) | 76.68(11)  |
| O(10)-Pr(1)-O(6) | 87.01(10)  | O(1)-Pr(1)-O(6)  | 81.81(10)  | O(7)-Pr(1)-O(6) | 148.08(11) |
| O(4)-Pr(1)-O(6)  | 70.79(11)  | O(8)-Pr(1)-O(6)  | 75.57(10)  | O(9)-Pr(1)-O(6) | 131.92(11) |
| O(2)-Cd(1)-O(3)  | 98.11(13)  | O(2)-Cd(1)-N(1)  | 84.93(11)  | O(3)-Cd(1)-N(1) | 106.98(11) |
| O(2)-Cd(1)-O(5)  | 99.49(12)  | O(3)-Cd(1)-O(5)  | 153.10(11) | O(5)-Cd(1)-N(1) | 94.72(11)  |
| O(2)-Cd(1)-N(2)  | 154.94(11) | O(3)-Cd(1)-N(2)  | 87.23(13)  | N(1)-Cd(1)-N(2) | 70.13(12)  |
| O(5)-Cd(1)-N(2)  | 85.39(12)  | O(2)-Cd(1)-O(6)  | 111.26(10) | O(3)-Cd(1)-O(6) | 101.26(11) |
| N(1)-Cd(1)-O(6)  | 145.04(10) | O(5)-Cd(1)-O(6)  | 53.20(10)  | N(2)-Cd(1)-O(6) | 91.43(11)  |

**Table S3** Selected bond lengths [Å] and angels [°] for complex **3**

|                  |            |                  |            |                  |            |
|------------------|------------|------------------|------------|------------------|------------|
| O(7)-Sm(1)-O(5)  | 159.78(12) | O(7)-Sm(1)-O(10) | 77.80(12)  | O(5)-Sm(1)-O(10) | 103.48(12) |
| O(7)-Sm(1)-O(1)  | 82.73(12)  | O(5)-Sm(1)-O(1)  | 77.72(12)  | O(10)-Sm(1)-O(1) | 79.82(12)  |
| O(7)-Sm(1)-O(9)  | 81.31(11)  | O(5)-Sm(1)-O(9)  | 112.04(12) | O(10)-Sm(1)-O(9) | 126.98(10) |
| O(1)-Sm(1)-O(9)  | 144.27(12) | O(7)-Sm(1)-O(8)  | 126.15(11) | O(5)-Sm(1)-O(8)  | 73.20(11)  |
| O(10)-Sm(1)-O(8) | 78.36(12)  | O(1)-Sm(1)-O(8)  | 138.06(12) | O(9)-Sm(1)-O(8)  | 75.94(11)  |
| O(7)-Sm(1)-O(3)  | 86.90(11)  | O(5)-Sm(1)-O(3)  | 82.19(11)  | O(10)-Sm(1)-O(3) | 149.27(11) |
| O(1)-Sm(1)-O(3)  | 71.84(11)  | O(9)-Sm(1)-O(3)  | 75.55(10)  | O(8)-Sm(1)-O(3)  | 131.35(11) |
| O(2)-Cd(1)-O(6)  | 98.09(14)  | O(2)-Cd(1)-O(4)  | 152.76(12) | O(6)-Cd(1)-O(4)  | 99.24(13)  |
| O(2)-Cd(1)-N(1)  | 107.25(12) | O(6)-Cd(1)-N(1)  | 85.05(12)  | O(4)-Cd(1)-N(1)  | 95.07(12)  |
| O(2)-Cd(1)-N(2)  | 87.54(13)  | O(6)-Cd(1)-N(2)  | 155.34(12) | O(4)-Cd(1)-N(2)  | 85.42(13)  |
| N(1)-Cd(1)-N(2)  | 70.38(13)  | O(2)-Cd(1)-O(3)  | 100.85(12) | O(6)-Cd(1)-O(3)  | 110.35(11) |
| O(4)-Cd(1)-O(3)  | 53.24(11)  | N(1)-Cd(1)-O(3)  | 145.69(11) | N(2)-Cd(1)-O(3)  | 91.92(12)  |

**Table S4** Selected bond lengths [Å] and angels [°] for complex **4**

|                  |            |                  |            |                 |            |
|------------------|------------|------------------|------------|-----------------|------------|
| O(10)-Ho(1)-O(3) | 159.97(13) | O(10)-Ho(1)-O(6) | 78.50(12)  | O(3)-Ho(1)-O(6) | 102.67(13) |
| O(10)-Ho(1)-O(2) | 81.64(13)  | O(3)-Ho(1)-O(2)  | 79.04(13)  | O(6)-Ho(1)-O(2) | 78.68(13)  |
| O(10)-Ho(1)-O(5) | 81.25(12)  | O(3)-Ho(1)-O(5)  | 112.54(12) | O(6)-Ho(1)-O(5) | 125.63(11) |
| O(2)-Ho(1)-O(5)  | 146.15(13) | O(10)-Ho(1)-O(9) | 125.50(11) | O(3)-Ho(1)-O(9) | 73.51(12)  |
| O(6)-Ho(1)-O(9)  | 76.72(12)  | O(2)-Ho(1)-O(9)  | 137.68(13) | O(5)-Ho(1)-O(9) | 75.36(12)  |
| O(10)-Ho(1)-O(8) | 85.96(12)  | O(3)-Ho(1)-O(8)  | 83.68(12)  | O(6)-Ho(1)-O(8) | 150.20(13) |
| O(2)-Ho(1)-O(8)  | 73.97(13)  | O(5)-Ho(1)-O(8)  | 75.87(11)  | O(9)-Ho(1)-O(8) | 132.38(12) |
| O(1)-Cd(1)-O(4)  | 99.80(16)  | O(1)-Cd(1)-N(1)  | 109.30(13) | O(4)-Cd(1)-N(1) | 86.59(14)  |
| O(1)-Cd(1)-O(7)  | 149.61(14) | O(4)-Cd(1)-O(7)  | 98.36(15)  | N(1)-Cd(1)-O(7) | 95.89(13)  |
| O(1)-Cd(1)-N(2)  | 87.95(15)  | O(4)-Cd(1)-N(2)  | 157.29(13) | N(1)-Cd(1)-N(2) | 70.70(15)  |
| O(7)-Cd(1)-N(2)  | 84.55(14)  | O(1)-Cd(1)-O(8)  | 98.08(12)  | O(4)-Cd(1)-O(8) | 105.82(12) |
| N(1)-Cd(1)-O(8)  | 147.65(13) | O(7)-Cd(1)-O(8)  | 53.35(11)  | N(2)-Cd(1)-O(8) | 94.03(12)  |
